# Supplementary material
Source: bioRxiv or medRxiv preprint supplement (https://medrxiv.org/highwire/filestream/87927/field_highwire_adjunct_files/0/2020.05.26.20114124-1.pdf)
Supplement: Supplementary file [file 2020.05.26.20114124-1.pdf]

## Supplementary information

| Patient ID | Age (years) | Sex    | COVID-19 symptoms | Weeks post-symptom onset of first seropositive sample | COVID-19 disease suspected by clinicians | Reported COVID-19 exposure | Mid-nasal specimen tested for SARS-CoV-2 by RT-PCR (result) | Admission type | Clinical notes                                                                                                                                  | RBD IgG ELISA AUC | Spike IgG ELISA AUC | Neutralization IC50 (reciprical serum dilution) | Abbot Index |
|------------|-------------|--------|-------------------|-------------------------------------------------------|------------------------------------------|----------------------------|-------------------------------------------------------------|----------------|-------------------------------------------------------------------------------------------------------------------------------------------------|-------------------|---------------------|-------------------------------------------------|-------------|
| 11c2f253   | 0 to 4      | Female | No                | N/A                                                   | No                                       | Household exposure         | No                                                          | Emergency      | Allergy related visit; previous household exposure but not tested because asymptomatic                                                          | 6.971             | 8.185               | 816.7                                           | 4.52        |
| 16daf987   | ≥15         | Male   | Yes, previously   | 3                                                     | Known to be previously infected          | Household exposure         | Yes (positive)                                              | Outpatient     | Previously SARS-CoV-2 positive after household exposure. Seen for chronic medical condition unrelated to COVID-19 several weeks later           | 9.298             | 12.62               | 106.2                                           | 7.81        |
| 820dcc2b   | 0 to 4      | Male   | No                | N/A                                                   | No                                       | None documented            | No                                                          | Emergency      | Melena without respiratory symptoms                                                                                                             | 14.83             | 14.93               | 193.9                                           | 9.29        |
| 90735c96   | ≥15         | Female | Yes               | 2                                                     | Yes                                      | Household exposure         | Yes (positive)                                              | Inpatient      | Previously SARS-CoV-2 positive after household exposure. Presented with worsening respiratory symptoms and had an underlying autoimmune disease | 12.08             | 16.32               | 8277                                            | 8.89        |
| be4c4842   | 0 to 4      | Male   | No                | N/A                                                   | No                                       | None documented            | Yes (negative)                                              | Inpatient      | Screened by RT-PCR before surgery for drainage of infection                                                                                     | 12.09             | 12.56               | 231.9                                           | 7.34        |
| d98c7284   | 10 to 14    | Male   | No                | N/A                                                   | No                                       | None documented            | No                                                          | Outpatient     | Routine visit for underlying cardiac condition                                                                                                  | 8.874             | 13.09               | 116.8                                           | 8.18        |
| da9ab30a   | 0 to 4      | Male   | No                | N/A                                                   | No                                       | None documented            | Yes (negative)                                              | Inpatient      | Screened by RT-PCR before surgery for drainage of infection                                                                                     | 11.63             | 13.07               | 184.7                                           | 7.54        |
| e014251d   | 5 to 9      | Male   | No                | N/A                                                   | No                                       | None documented            | No                                                          | Outpatient     | Routine blood draw for underlying cardiovascular condition                                                                                      | 10.14             | 11.24               | 45.96                                           | 7.49        |

**Supplementary Table 1:** Clinical characteristics of seropositive patients. If a patient had multiple samples (n=2 seropositive patients), age and admission type were determined based on sample from patient's first visit; for serological assays, data from the patient's last sample is shown. A patient was reported as positive for RT-PCR testing if they had ever received a positive result, including at timepoints prior to samples tested in this study.

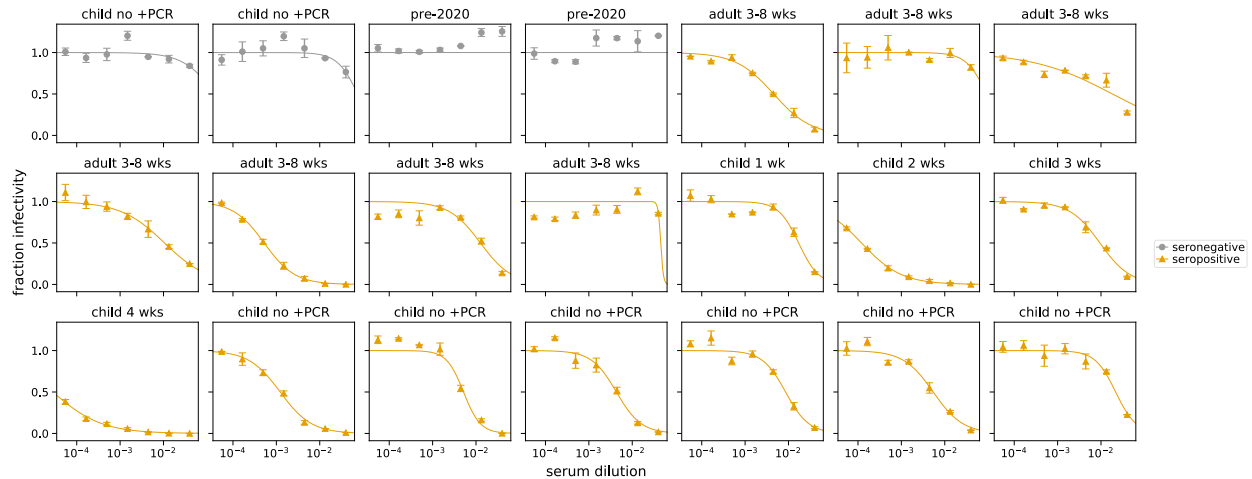

**Supplementary Figure 1:** Full neutralization curves for all sera that were used to calculate the IC50s plotted in Figure 3. The raw values plotted here are in Supplementary Data 3, and numerical values for the IC50s are in Supplementary Data 4.

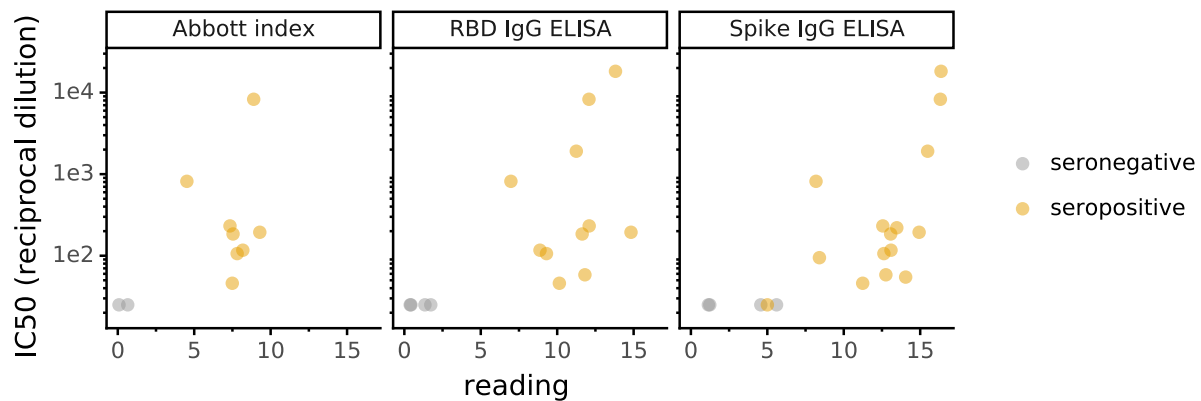

**Supplementary Figure 2:** Correlation of the IC50s from the neutralization assays to the AUCs measured in the ELISAs or the Abbott assay index for all samples tested in both pairs of assays. The numerical values are in Supplementary Data 4.

**Supplementary Data 1:** De-identified clinical data, raw OD450 values from RBD IgG ELISA screen, AUCs from follow up ELISAs, and Abbott index values for each sample.

**Supplementary Data 2:** Raw OD450 values across all titrations from RBD and spike follow-up IgG ELISAs.

**Supplementary Data 3:** Fraction infectivity values across all titrations from spike-pseudotyped lentivirus neutralization assays.

**Supplementary Data 4:** Summary IC50 values, RBD and Spike IgG ELISA AUC values, and Abbot index values for all samples run in spike-pseudotyped lentivirus neutralization assays.
